# Supplementary material for: Dynamic nature of SecA and its associated proteins in Escherichia coli
Source: Front Microbiol. 2015 Feb 10;6:75. doi: 10.3389/fmicb.2015.00075 (PMC4322705; doi:10.3389/fmicb.2015.00075)
Supplement: Movie S1 — Nucleoid with tortuous structures (PA340). [file Presentation1.ZIP]

Archive with 85 entries (82 files):
- supplementary movies (merge)/
- supplementary movies (merge)/.DS_Store
- __MACOSX/
- __MACOSX/supplementary movies (merge)/
- __MACOSX/supplementary movies (merge)/._.DS_Store
- supplementary movies (merge)/Movie S1.mov
- __MACOSX/supplementary movies (merge)/._Movie S1.mov
- supplementary movies (merge)/Movie S10.mov
- __MACOSX/supplementary movies (merge)/._Movie S10.mov
- supplementary movies (merge)/Movie S11.mov
- __MACOSX/supplementary movies (merge)/._Movie S11.mov
- supplementary movies (merge)/Movie S12.mov
- __MACOSX/supplementary movies (merge)/._Movie S12.mov
- supplementary movies (merge)/Movie S13.mov
- __MACOSX/supplementary movies (merge)/._Movie S13.mov
- supplementary movies (merge)/Movie S14.mov
- __MACOSX/supplementary movies (merge)/._Movie S14.mov
- supplementary movies (merge)/Movie S15.mov
- __MACOSX/supplementary movies (merge)/._Movie S15.mov
- supplementary movies (merge)/Movie S16.mov
- __MACOSX/supplementary movies (merge)/._Movie S16.mov
- supplementary movies (merge)/Movie S17.mov
- __MACOSX/supplementary movies (merge)/._Movie S17.mov
- supplementary movies (merge)/Movie S18.mov
- __MACOSX/supplementary movies (merge)/._Movie S18.mov
- supplementary movies (merge)/Movie S19.mov
- __MACOSX/supplementary movies (merge)/._Movie S19.mov
- supplementary movies (merge)/Movie S2.mov
- __MACOSX/supplementary movies (merge)/._Movie S2.mov
- supplementary movies (merge)/Movie S20.mov
- __MACOSX/supplementary movies (merge)/._Movie S20.mov
- supplementary movies (merge)/Movie S21.mov
- __MACOSX/supplementary movies (merge)/._Movie S21.mov
- supplementary movies (merge)/Movie S22.mov
- __MACOSX/supplementary movies (merge)/._Movie S22.mov
- supplementary movies (merge)/Movie S23.mov
- __MACOSX/supplementary movies (merge)/._Movie S23.mov
- supplementary movies (merge)/Movie S24.mov
- __MACOSX/supplementary movies (merge)/._Movie S24.mov
- supplementary movies (merge)/Movie S25.mov
- __MACOSX/supplementary movies (merge)/._Movie S25.mov
- supplementary movies (merge)/Movie S26.mov
- __MACOSX/supplementary movies (merge)/._Movie S26.mov
- supplementary movies (merge)/Movie S27.mov
- __MACOSX/supplementary movies (merge)/._Movie S27.mov
- supplementary movies (merge)/Movie S28.mov
- __MACOSX/supplementary movies (merge)/._Movie S28.mov
- supplementary movies (merge)/Movie S29.mov
- __MACOSX/supplementary movies (merge)/._Movie S29.mov
- supplementary movies (merge)/Movie S3.mov
- __MACOSX/supplementary movies (merge)/._Movie S3.mov
- supplementary movies (merge)/Movie S30.mov
- __MACOSX/supplementary movies (merge)/._Movie S30.mov
- supplementary movies (merge)/Movie S31.mov
- __MACOSX/supplementary movies (merge)/._Movie S31.mov
- supplementary movies (merge)/Movie S32.mov
- __MACOSX/supplementary movies (merge)/._Movie S32.mov
- supplementary movies (merge)/Movie S33.mov
- __MACOSX/supplementary movies (merge)/._Movie S33.mov
- supplementary movies (merge)/Movie S34.mov
- __MACOSX/supplementary movies (merge)/._Movie S34.mov
- supplementary movies (merge)/Movie S35.mov
- __MACOSX/supplementary movies (merge)/._Movie S35.mov
- supplementary movies (merge)/Movie S36.mov
- __MACOSX/supplementary movies (merge)/._Movie S36.mov
- supplementary movies (merge)/Movie S37.mov
- __MACOSX/supplementary movies (merge)/._Movie S37.mov
- supplementary movies (merge)/Movie S38.mov
- __MACOSX/supplementary movies (merge)/._Movie S38.mov
- supplementary movies (merge)/Movie S39.mov
- __MACOSX/supplementary movies (merge)/._Movie S39.mov
- supplementary movies (merge)/Movie S4.mov
- __MACOSX/supplementary movies (merge)/._Movie S4.mov
- supplementary movies (merge)/Movie S40.mov
- __MACOSX/supplementary movies (merge)/._Movie S40.mov
- supplementary movies (merge)/Movie S5.mov
- __MACOSX/supplementary movies (merge)/._Movie S5.mov
- supplementary movies (merge)/Movie S6.mov
- __MACOSX/supplementary movies (merge)/._Movie S6.mov
- supplementary movies (merge)/Movie S7.mov
- __MACOSX/supplementary movies (merge)/._Movie S7.mov
- supplementary movies (merge)/Movie S8.mov
- __MACOSX/supplementary movies (merge)/._Movie S8.mov
- supplementary movies (merge)/Movie S9.mov
- __MACOSX/supplementary movies (merge)/._Movie S9.mov
